# Supplementary material
Source: publisher site journal article supplement (http://e-cmh.org/upload/media/cmh-2023-0343-Supplementary-Table-8.pdf)
Supplement: Supplementary file 1 [file cmh-2023-0343-Supplementary-Table-8.pdf]

**Supplementary Table 8.** Summary of drug repositioning for MASLD and supporting evidence

| Drug               | P-value  | Hepatotoxicity | Experimental evidence for MASLD | Experimental evidence for other liver diseases | Clinical evidence for MASLD | Clinical evidence for other liver diseases |
|--------------------|----------|----------------|---------------------------------|------------------------------------------------|-----------------------------|--------------------------------------------|
| Imatinib           | 0.001184 | None           | 30333571                        |                                                |                             |                                            |
| Erlotinib          | 0.002979 | None           | 29038049                        |                                                |                             | 19139433                                   |
| Estrone            | 0.003286 | None           |                                 |                                                |                             |                                            |
| Methyltestosterone | 0.005522 | None           |                                 |                                                |                             |                                            |
| Obeticholic acid   | 0.006746 | Exist          |                                 |                                                |                             |                                            |
| Nitrofurantoin     | 0.007134 | Exist          |                                 |                                                |                             |                                            |
| Lomustine          | 0.013728 | None           |                                 |                                                |                             |                                            |
| Vitamin A          | 0.014435 | None           | 32698042                        |                                                |                             | 28371374                                   |
| Sorafenib          | 0.014484 | Exist          |                                 |                                                |                             |                                            |
| Valproic acid      | 0.020411 | Exist          |                                 |                                                |                             |                                            |
| Carbamazepine      | 0.020728 | Exist          |                                 |                                                |                             |                                            |
| Thalidomide        | 0.020886 | None           | 20088867                        |                                                |                             |                                            |
| Verteporfin        | 0.020933 | None           | 33964370                        | 34101869                                       |                             |                                            |
| Thrombin           | 0.022971 | None           | 25138021                        |                                                |                             |                                            |
| Dexamethasone      | 0.042834 | None           | 27784782                        |                                                |                             |                                            |

The numbers shown in the table represent PubMed Identifier (PMID) numbers, which provide evidence for the foundational research and clinical studies supporting the therapeutic effects of the respective drugs.

MASLD, Non-alcoholic fatty liver disease.
